# Supplementary material for: Comparison of drugs for active eosinophilic oesophagitis: systematic review and network meta-analysis
Source: HighWire-hosted journal article supplement (doi:10.1136/gutjnl-2023-329873), 2023-07-25
Supplement: gutjnl-2023-329873supp001_data_supplement.pdf [file gutjnl-2023-329873supp001_data_supplement.pdf]

## SUPPLEMENTARY TABLES AND FIGURES

Supplementary Table 1. Excluded Studies After Full Paper Revision and Reason for Exclusion

| Reference                                                                                                                                                                                                                                                                                                                                                                                                                                                                                                                                                                                                                                                                                              | Reason for Exclusion                                                                                                                                                |
|--------------------------------------------------------------------------------------------------------------------------------------------------------------------------------------------------------------------------------------------------------------------------------------------------------------------------------------------------------------------------------------------------------------------------------------------------------------------------------------------------------------------------------------------------------------------------------------------------------------------------------------------------------------------------------------------------------|---------------------------------------------------------------------------------------------------------------------------------------------------------------------|
| Straumann, A., Hoesli, S., Bussmann, C.h, Stuck, M., Perkins, M., Collins, L. P., Payton, M., Pettipher, R., Hunter, M., Steiner, J., & Simon, H. U. (2013). Anti-eosinophil activity and clinical efficacy of the CRTH2 antagonist OC000459 in eosinophilic esophagitis. <i>Allergy</i> , 68(3), 375–385. <a href="https://doi.org/10.1111/all.12096">https://doi.org/10.1111/all.12096</a>                                                                                                                                                                                                                                                                                                           | Did not report extractable data on endpoints of interest.<br>No thresholds for histologic remission, only a change in eosinophil load.<br>EREFS score not reported. |
| Dupilumab Improves Clinical and Histologic Aspects of Disease in Adult and Adolescent Patients With Eosinophilic Esophagitis at Week 24: Results from Part B of the 3-Part LIBERTY EoE TREET Study.<br>Rothenberg M., Dellon E., Bredenoord A., Collins M., Hirano I., Chehade M., Lucendo A., Spergel J., Sun X., Hamilton J., Mujumdar U., McCann E., Mannent L., Akinlade B., Laws E., Amin N., Giannelou A., Patel K., Beazley B., Shabbir A. Journal of Allergy and Clinical Immunology. Conference: 2022 AAAAI Annual Meeting. Phoenix United States. 149(2 Supplement) (pp AB312), 2022. Date of Publication: February 2022.                                                                    | Dual publication of an already included study.                                                                                                                      |
| Dupilumab efficacy and safety up to 52 weeks in adult and adolescent patients with eosinophilic esophagitis: Results from part a and c of a randomized, placebo-controlled, three-part, phase 3 liberty eoe treet study.<br>Dellon E.S., Rothenberg M.E., Collins M.H., Hirano I., Chehade M., Bredenoord A.J., Lucendo A.J., Spergel J.M., Zhao Q., Hamilton J.D., Mujumdar U., Kamat S., Mannent L.P., Akinlade B., Laws E., Amin N., Shumel B., Rowe P.J., Deniz Y., Jacob-Nara J.A., Patel K., Maloney J., Casullo V.M. United European Gastroenterology Journal. Conference: 29th United European Gastroenterology Week. Virtual. 9(10) (pp 1204-1207), 2021. Date of Publication: December 2021. | Dual publication of an already included study.                                                                                                                      |
| Loss Of Histologic, Symptom And Endoscopic Efficacy Following Treatment Withdrawal In Patients With Eosinophilic Esophagitis: A Phase 3, Randomized Withdrawal Study Of Budesonide Oral Suspension.<br>Dellon E.S., Collins M.H., Katzka D.A., Mukkada V.A., Falk G.W., Morey R., Goodwin B., Eisner J.D., Lan L., Desai N.K., Williams J., Hirano I. Gastroenterology. Conference: DDW 2021. Virtual, Online. 160(6 Supplement) (pp S-247-S-248), 2021. Date of Publication: May 2021.                                                                                                                                                                                                                | Not a randomised controlled trial.                                                                                                                                  |

|                                                                                                                                                                                                                                                                                                                                                                                                                                                                                                                                                                            |                                                |
|----------------------------------------------------------------------------------------------------------------------------------------------------------------------------------------------------------------------------------------------------------------------------------------------------------------------------------------------------------------------------------------------------------------------------------------------------------------------------------------------------------------------------------------------------------------------------|------------------------------------------------|
| <p>BUDESONIDE ORODISPERSIBLE TABLETS IMPROVE THE ESOPHAGEAL DISTENSIBILITY AFTER 6-WEEK TREATMENT IN ACTIVE EOSINOPHILIC ESOPHAGITIS: RESULTS FROM A SUBSET ANALYSIS OF THE RANDOMIZED, DOUBLE-BLIND, MULTICENTER, PLACEBO-CONTROLLED EOS-1 TRIAL.</p> <p>Lucendo A., Schlag C., Straumann A., Ortega G.J., Sanz-Garcia A., Santander C., Mueller R., Greinwald R., Attwood S.E. Gastroenterology. Conference: DDW 2021. Virtual, Online. 160(6 Supplement) (pp S-247), 2021. Date of Publication: May 2021.</p>                                                           | Dual publication of an already included study. |
| <p>Low Rates Of Glucocorticoid-Related Adverse Effects With Long-Term Treatment Of Eosinophilic Esophagitis With Fluticasone Propionate Orally Disintegrating Tablet (Apt-1011): Results From 52 Weeks Of Exposure In A Phase 2b Trial.</p> <p>Dellon E.S., Falk G.W., Lucendo A., Schlag C., Schoepfer A.M., Eagle G., Nezamis J.P., Comer G.M., Knoop K., Hirano I. Gastroenterology. Conference: DDW 2021. Virtual, Online. 160(6 Supplement) (pp S-248-S-249), 2021. Date of Publication: May 2021.</p>                                                                | Dual publication of an already included study. |
| <p>FLUTICASONE PROPIONATE ORALLY DISINTEGRATING TABLET (APT-1011) IMPROVES HISTOLOGIC, ENDOSCOPIC AND SYMPTOMATIC RESPONSES IN EOSINOPHILIC ESOPHAGITIS PATIENTS WITH FIBRO-STENOTIC FEATURES: RESULTS FROM A PHASE 2B TRIAL.</p> <p>Dellon E.S., Falk G.W., Lucendo A., Schlag C., Schoepfer A.M., Eagle G., Nezamis J.P., Comer G.M., Knoop K. Gastroenterology. Conference: DDW 2021. Virtual, Online. 160(6 Supplement) (pp S-111-S-112), 2021. Date of Publication: May 2021.</p>                                                                                     | Dual publication of an already included study. |
| <p>Dellon, E. S., Collins, M. H., Katzka, D. A., Mukkada, V. A., Falk, G. W., Morey, R., Goodwin, B., Eisner, J. D., Lan, L., Desai, N. K., Williams, J., Hirano, I., &amp; ORBIT2/SHP621-302 Investigators (2022). Long-Term Treatment of Eosinophilic Esophagitis With Budesonide Oral Suspension. <i>Clinical gastroenterology and hepatology : the official clinical practice journal of the American Gastroenterological Association</i>, 20(7), 1488–1498.e11. <a href="https://doi.org/10.1016/j.cgh.2021.06.020">https://doi.org/10.1016/j.cgh.2021.06.020</a></p> | Maintenance of remission study.                |
| <p>Patient-reported symptom improvement following treatment with APT-1011 in patients with eosinophilic esophagitis as measured by the prose: Results from flute, a phase 2b clinical trial.</p> <p>Turner R., Rohay J.M., Sparling N., Whitsett J., Eagle G., Nezamis J., Knoop K., Dellon E.S., Hirano I., Paty J. American Journal of Gastroenterology. Conference: Annual Scientific Meeting of the American College of Gastroenterology, ACG 2021. Las Vegas, NV United States. 116(SUPPL) (pp S203), 2021. Date of Publication: October 2021.</p>                    | Dual publication of an already included study  |

|                                                                                                                                                                                                                                                                                                                                                                                                                                                                                                                                                                                                                                          |                                                                                        |
|------------------------------------------------------------------------------------------------------------------------------------------------------------------------------------------------------------------------------------------------------------------------------------------------------------------------------------------------------------------------------------------------------------------------------------------------------------------------------------------------------------------------------------------------------------------------------------------------------------------------------------------|----------------------------------------------------------------------------------------|
| <p>PI02.05 long-term treatment of patients with eosinophilic gastritis and/or eosinophilic duodenitis with lirentelimab, a monoclonal antibody against siglec-8.</p> <p>Peterson K., Chehade M., Murray J., Falk G., Gonsalves N., Genta R., Rothenberg M., Bledsoe A., Durrani S., Vaezi M., Shaw C., Rasmussen H., Singh B., Chang A., Kamboj A., Hirano I., Dellon E. Diseases of the Esophagus. Conference: 17th ISDE World Congress for Esophageal Diseases. Virtual. 34(SUPPL 1) (pp 47-48), 2021. Date of Publication: September 2021.</p>                                                                                        | Not the disease of interest.                                                           |
| <p>Budesonide orodispersible tablets maintain remission in a randomized, placebo-controlled trial of patients with eosinophilic esophagitis.</p> <p>Straumann A., Lucendo A.J., Biedermann L., Hruz P., Mueller R., Greinwald R., Schoepfer A., Attwood S. Swiss Medical Weekly. Conference: Annual Meeting of the Swiss Society of Gastroenterology, SGG-SSG, Swiss Visceral Surgeons, SGVC-SSCV, Swiss Association for the Study of the Liver, SASL and Swiss Society of Endoscopy Nurses and Associates, SVEP-ASPE. Interlaken Switzerland. 151(SUPPL 253) (pp 2S), 2021. Date of Publication: 2021.</p>                              | Maintenance of remission study.                                                        |
| <p>Straumann, A., Lucendo, A. J., Miehke, S., Vieth, M., Schlag, C., Biedermann, L., Vaquero, C. S., Ciriza de Los Rios, C., Schmoeker, C., Madisch, A., Hruz, P., Hayat, J., von Arnim, U., Bredenoord, A. J., Schubert, S., Mueller, R., Greinwald, R., Schoepfer, A., Attwood, S., &amp; International EOS-2 Study Group (2020). Budesonide Orodispersible Tablets Maintain Remission in a Randomized, Placebo-Controlled Trial of Patients With Eosinophilic Esophagitis. <i>Gastroenterology</i>, 159(5), 1672–1685.e5. <a href="https://doi.org/10.1053/j.gastro.2020.07.039">https://doi.org/10.1053/j.gastro.2020.07.039</a></p> | Maintenance of remission study.                                                        |
| <p>Dupilumab Improves Health-Related Quality of Life (HRQoL) and Reduces Symptom Burden in Patients with Eosinophilic Esophagitis (EoE): Results From Part A of a Randomized, Placebo-Controlled Three-Part Phase 3 Study.</p> <p>Dellon E., Rothenberg M., Hirano I., Chehade M., Bredenoord A.J., Spergel J., Zhao Q., Beazley B., Guillemin I., Mannent L., Laws E., Amin N., Shumel B., Maloney J., Kamat S. <i>Journal of Allergy and Clinical Immunology</i>. Conference: 2021 AAAAI Virtual Annual Meeting. Virtual, Online. 147(2 Supplement) (pp AB91), 2021. Date of Publication: February 2021.</p>                           | Dual publication of an already included study                                          |
| <p>Collins, M. H., Dellon, E. S., Katzka, D. A., Hirano, I., Williams, J., &amp; Lan, L. (2019). Budesonide Oral Suspension Significantly Improves Eosinophilic Esophagitis Histology Scoring System Results: Analyses From a 12-Week, Phase 2, Randomized, Placebo-controlled Trial. <i>The American journal of surgical pathology</i>, 43(11), 1501–1509. <a href="https://doi.org/10.1097/PAS.0000000000001361">https://doi.org/10.1097/PAS.0000000000001361</a></p>                                                                                                                                                                  | Dual publication and sub-analysis of an already included study. No outcome of interest |
| <p>Improved Histopathologic Features in Patients with Eosinophilic Esophagitis: Results and Analyses from a Phase 3, Randomized, Placebo-Controlled Trial of Budesonide Oral Suspension.</p> <p>Collins M.H., Hirano I., Katzka D.A., Mukkada V.A., Falk G.W., Williams J.E., Desai N.K., Lan L., Dellon E.S. <i>American Journal of Gastroenterology</i>. Conference: 2020 Annual Scientific Meeting of the American College of Gastroenterology, ACG 2020. Nashville, TN United States. 115(SUPPL) (pp S200-S201), 2020. Date of Publication: October 2020.</p>                                                                        | Dual publication and sub-analysis of an already included study. No outcome of interest |
| <p>Determination of the Eosinophilic Esophagitis Endoscopic Reference Score Associated with Histologic Response to Therapy: Analysis from a Phase 3 Placebo-Controlled Trial of Budesonide Oral Suspension.</p> <p>Hirano I., Collins M.H., Katzka D.A., Mukkada V.A., Falk G.W., Williams J.E., Desai N.K., Lan L., Dellon E.S. <i>American Journal of Gastroenterology</i>. Conference: 2020 Annual Scientific Meeting of the American College of Gastroenterology, ACG 2020. Nashville, TN United States. 115(SUPPL) (pp S217-S218), 2020. Date of Publication: October 2020.</p>                                                     | Dual publication and sub-analysis of an already included study. No outcome of interest |

|                                                                                                                                                                                                                                                                                                                                                                                                                                                                                                                                                                                                               |                                                                                         |
|---------------------------------------------------------------------------------------------------------------------------------------------------------------------------------------------------------------------------------------------------------------------------------------------------------------------------------------------------------------------------------------------------------------------------------------------------------------------------------------------------------------------------------------------------------------------------------------------------------------|-----------------------------------------------------------------------------------------|
| <p>Safety and Efficacy of Long-Term Treatment of EoE with Fluticasone Propionate Orally Disintegrating Tablet (APT-1011): Results from 40 Weeks Treatment in a Phase 2b Randomized Double-Blind Placebo-Controlled Trial.</p> <p>Dellon E.S., Lucendo A., Schlag C., Schoepfer A., Falk G.W., Richardson P., Eagle G., Nezamis J., Comer G., Knoop K., Hirano I. American Journal of Gastroenterology. Conference: 2020 Annual Scientific Meeting of the American College of Gastroenterology, ACG 2020. Nashville, TN United States. 115(SUPPL) (pp S169-S170), 2020. Date of Publication: October 2020.</p> | Dual publication of an already included study                                           |
| <p>227 BUDESONIDE ORAL SUSPENSION (BOS) IMPROVES ENDOSCOPIC ACTIVITY IN ADOLESCENTS AND ADULTS WITH EOSINOPHILIC ESOPHAGITIS: RESULTS AND CORRELATION ANALYSIS FROM A PHASE 3, RANDOMIZED, PLACEBO-CONTROLLED TRIAL.</p> <p>Hirano I., Collins M.H., Katzka D.A., Mukkada V.A., Falk G.W., Williams J., Desai N.K., Lan L., Dellon E.S. Gastroenterology. Conference: Digestive Disease Week (DDW) 2020. Chicago United States. 158(6 Supplement 1) (pp S-42-S-43), 2020. Date of Publication: May 2020.</p>                                                                                                  | Dual publication of an already included study                                           |
| <p>AN EPISODE-BASED, PATIENT-REPORTED OUTCOME MEASURE OF DYSPHAGIA ACCURATELY CAPTURES RESPONSE TO TREATMENT WITH APT-1011 IN A PHASE 2B, RANDOMIZED, DOUBLE-BLIND, PLACEBO-CONTROLLED, CLINICAL TRIAL IN ADULTS WITH EOSINOPHILIC ESOPHAGITIS.</p> <p>Dellon E.S., Falk G.W., Hirano I., Lucendo A., Schlag C., Schoepfer A.M., Eagle G., Nezamis J.P., Sparling N., Richardson P., Knoop K., Paty J. Gastroenterology. Conference: Digestive Disease Week (DDW) 2020. Chicago United States. 158(6 Supplement 1) (pp S-817), 2020. Date of Publication: May 2020.</p>                                       | Dual publication and sub-analysis of an already included study. No outcome of interest. |
| <p>PREDICTORS OF RESPONSE TO CORTICOSTEROID THERAPY IN PATIENTS WITH EOSINOPHILIC ESOPHAGITIS: RESULTS FROM A PHASE 3, RANDOMIZED, PLACEBO-CONTROLLED TRIAL OF BUDESONIDE ORAL SUSPENSION.</p> <p>Hirano I., Katzka D.A., Collins M.H., Mukkada V.A., Gold B.D., Falk G.W., Williams J., Desai N.K., Lan L., Dellon E.S. Gastroenterology. Conference: Digestive Disease Week (DDW) 2020. Chicago United States. 158(6 Supplement 1) (pp S-817-S-818), 2020. Date of Publication: May 2020.</p>                                                                                                               | Dual publication and sub-analysis of an already included study. No outcome of interest. |
| <p>AK002, an Anti-Siglec-8 Antibody, Depletes Tissue Eosinophils and Improves Dysphagia Symptoms in Patients with Eosinophilic Esophagitis.</p> <p>Hirano I., Peterson K., Murray J., Dellon E., Falk G., Gonsalves N., Chehade M., Leung J., Genta R., Khoury P., Bledsoe A., Shaw C., Rasmussen H., Singh B., Chang A., Kamboj A., Rothenberg M. Journal of Allergy and Clinical Immunology. Conference: 2020 AAAAI Annual Meeting. Philadelphia United States. 145(2 Supplement) (pp AB167), 2020. Date of Publication: February 2020.</p>                                                                 | Not the disease of interest.                                                            |

|                                                                                                                                                                                                                                                                                                                                                                                                                                                                                                                                                                                                                                                                                 |                                                                                               |
|---------------------------------------------------------------------------------------------------------------------------------------------------------------------------------------------------------------------------------------------------------------------------------------------------------------------------------------------------------------------------------------------------------------------------------------------------------------------------------------------------------------------------------------------------------------------------------------------------------------------------------------------------------------------------------|-----------------------------------------------------------------------------------------------|
| <p>Budesonide Oral Suspension Improves Histologic Features In Patients With Eosinophilic Esophagitis: Results From A Phase 3, Randomized, Double-blind, Placebo-Controlled Trial.</p> <p>Collins M., Hirano I., Katzka D., Cianferoni A., Williams J., Desai N., Lan L., Dellon E.</p> <p>Journal of Allergy and Clinical Immunology. Conference: 2020 AAAAI Annual Meeting. Philadelphia United States. 145(2 Supplement) (pp AB166), 2020. Date of Publication: February 2020.</p>                                                                                                                                                                                            | <p>Dual publication and sub-analysis of an already included study. No outcome of interest</p> |
| <p>ORAL VISCOUS BUDESONIDE VERSUS SWALLOWED FLUTICASONE INHALER FOR INITIAL TREATMENT OF ADOLESCENTS AND ADULTS WITH EOSINOPHILIC ESOPHAGITIS: A RANDOMIZED, DOUBLE-BLIND, DOUBLE-DUMMY CLINICAL TRIAL.</p> <p>Dellon E.S., Woosley J.T., Arrington A., McGee S.J., Covington J., Moist S.E., Gebhart J.H., Tylicki A.E., Shoyoye S.O., Martin C., Galanko J., Baron J.A., Shaheen N.J. Gastroenterology. Conference: Digestive Disease Week, DDW 2019. San Diego United States. 156(6 Supplement 1) (pp S-72-S-73), 2019. Date of Publication: 2019.</p>                                                                                                                       | <p>Dual publication of an already included study</p>                                          |
| <p>BUDESONIDE ORODISPERSIBLE TABLETS CAN EFFECTIVELY INDUCE COMPLETE REMISSION OF ENDOSCOPIC AND HISTOLOGIC MUCOSAL ABNORMALITIES AND CAN INDUCE DEEP DISEASE REMISSION IN ACTIVE EOSINOPHILIC ESOPHAGITIS: RESULTS FROM A POST-HOC ANALYSIS OF THE RANDOMIZED, DOUBLE-BLIND, PLACEBO-CONTROLLED EOS-1 TRIAL.</p> <p>Lucendo A., Schlag C., Straumann A., Vieth M., Mueller R., Greinwald R., Miehlke S. Gastroenterology. Conference: Digestive Disease Week, DDW 2019. San Diego United States. 156(6 Supplement 1) (pp S-715-S-716), 2019. Date of Publication: 2019.</p>                                                                                                    | <p>Dual publication of an already included study</p>                                          |
| <p>RAPID RECURRENCE OF SYMPTOMS, ENDOSCOPIC FINDINGS, AND ESOPHAGEAL EOSINOPHILIA WITHOUT MAINTENANCE THERAPY AFTER SUCCESSFUL INITIAL TREATMENT: RESULTS FROM THE OBSERVATION PHASE OF A RANDOMIZED, DOUBLE-BLIND, DOUBLE DUMMY CLINICAL TRIAL.</p> <p>Dellon E.S., Woosley J.T., Arrington A., McGee S.J., Covington J., Moist S.E., Gebhart J.H., Martin C., Galanko J., Baron J.A., Shaheen N.J. Gastroenterology. Conference: Digestive Disease Week, DDW 2019. San Diego United States. 156(6 Supplement 1) (pp S-713-S-714), 2019. Date of Publication: 2019.</p>                                                                                                        | <p>Relapse of disease activity study.</p>                                                     |
| <p>BUDESONIDE ORODISPERSIBLE TABLETS ARE HIGHLY EFFECTIVE TO MAINTAIN CLINICO-HISTOLOGICAL REMISSION IN ADULT PATIENTS WITH EOSINOPHILIC ESOPHAGITIS: RESULTS FROM THE 48-WEEKS, DOUBLE-BLIND, PLACEBO-CONTROLLED, PIVOTAL EOS-2 TRIAL.</p> <p>Lucendo A., Miehlke S., Vieth M., Schlag C., Biedermann L., Santander C., Ciriza de los Rios C., Hartmann D., Madisch A., Hruz P., Hayat J.O., Arnim U.V., Bredenoord A.J., Schubert S., Attwood S.E., Mueller R., Greinwald R., Schoepfer A.M., Straumann A. Gastroenterology. Conference: Digestive Disease Week, DDW 2019. San Diego United States. 156(6 Supplement 1) (pp S-1509), 2019. Date of Publication: May 2019.</p> | <p>Maintenance of remission study.</p>                                                        |

|                                                                                                                                                                                                                                                                                                                                                                                                                                                                                                                                                                                                                                                                                                                                              |                                               |
|----------------------------------------------------------------------------------------------------------------------------------------------------------------------------------------------------------------------------------------------------------------------------------------------------------------------------------------------------------------------------------------------------------------------------------------------------------------------------------------------------------------------------------------------------------------------------------------------------------------------------------------------------------------------------------------------------------------------------------------------|-----------------------------------------------|
| <p>EFFICACY OF BUDESONIDE ORODISPERSIBLE TABLETS FOR INDUCTION OF REMISSION IN PATIENTS WITH ACTIVE EOSINOPHILIC ESOPHAGITIS: RESULTS FROM THE 6-WEEKS OPEN-LABEL TREATMENT PHASE OF EOS-2 TRIAL. Schlag C., Miehke S., Lucendo A., Biedermann L., Santander C., Hartmann D., Hayat J.O., Hruz P., de los Rios C.C., Bredenoord A.J., Vieth M., Mueller R., Greinwald R., Straumann A. Gastroenterology. Conference: Digestive Disease Week, DDW 2019. San Diego United States. 156(6 Supplement 1) (pp S-715), 2019. Date of Publication: 2019.</p>                                                                                                                                                                                         | Dual publication of an already included study |
| <p>Budesonide orodispersible tablets are superior to maintain and even further improve quality of life in adult patients with eosinophilic esophagitis: Results from the 48-weeks, double-blind, placebo-controlled pivotal EOS-2 trial. Schlag C., Biedermann L., Lucendo A.J., Miehke S., Santander Vaquero C., Ciriza De Los Rios C., Hartmann D., Madisch A., Hruz P., Hayat J., Von Arnim U., Bredenoord A., Muller R., Greinwald R., Schoepfer A., Attwood S.E., Straumann A. United European Gastroenterology Journal. Conference: 27th United European Gastroenterology Week, UEG. Barcelona Spain. 7(8 Supplement) (pp 705), 2019. Date of Publication: October 2019.</p>                                                           | Maintenance of remission study.               |
| <p>A novel budesonide orodispersible tablet with a special esophageal-targeting can induce complete clinical, endoscopic and histologic remission in active Eosinophilic Esophagitis: Results from a post-hoc analysis of the randomized, double-blind, placebo-controlled EOS-1 trial. Miehke S., Schlag C., Straumann A., Vieth M., Muller R., Greinwald R., Lucendo A.J. United European Gastroenterology Journal. Conference: 27th United European Gastroenterology Week, UEG. Barcelona Spain. 7(8 Supplement) (pp 423), 2019. Date of Publication: October 2019.</p>                                                                                                                                                                   | Dual publication of an already included study |
| <p>A novel budesonide orodispersible tablet formulation is highly effective to maintain endoscopic inflammatory remission and even complete endoscopic remission in adult patients with eosinophilic esophagitis : Results from the 48-weeks, double-blind, placebo-controlled pivotal EOS-2 trial. Biedermann L., Lucendo A.J., Miehke S., Schlag C., Santander Vaquero C., Ciriza De Los Rios C., Hartmann D., Madisch A., Hruz P., Hayat J., Von Arnim U., Bredenoord A., Muller R., Greinwald R., Schoepfer A., Attwood S.E., Straumann A. United European Gastroenterology Journal. Conference: 27th United European Gastroenterology Week, UEG. Barcelona Spain. 7(8 Supplement) (pp 55), 2019. Date of Publication: October 2019.</p> | Maintenance of remission study.               |
| <p>A novel oral budesonide formulation is highly effective for induction of remission in patients with active eosinophilic esophagitis : Results from the 6-weeks open-label treatment phase of EOS-2 trial. Lucendo A.J., Schlag C., Miehke S., Biedermann L., Santander Vaquero C., Hartmann D., Hayat J., Hruz P., Ciriza De Los Rios C., Bredenoord A., Vieth M., Muller R., Greinwald R., Straumann A. United European Gastroenterology Journal. Conference: 27th United European Gastroenterology Week, UEG. Barcelona Spain. 7(8 Supplement) (pp 54), 2019. Date of Publication: October 2019.</p>                                                                                                                                    | Not a randomised controlled trial.            |
| <p>Efficacy of budesonide oral suspension for eosinophilic esophagitis in adolescents and adults: Results from a phase 3, randomized, placebo-controlled trial. Hirano I., Collins M.H., Katzka D.A., Mukkada V.A., Falk G.W., Williams J., Desai N.K., Lan L., Morey R., Dellon E.S. American Journal of Gastroenterology. Conference: 2019 Annual Scientific Meeting and Postgraduate Course of the American College of Gastroenterology, ACG 2019. San Antonio, TX United States. 114(Supplement) (pp S205-S206), 2019. Date of Publication: October 2019.</p>                                                                                                                                                                            | Dual publication of an already included study |

|                                                                                                                                                                                                                                                                                                                                                                                                                                                                                                                                                                                                                                                                |                                                                                           |
|----------------------------------------------------------------------------------------------------------------------------------------------------------------------------------------------------------------------------------------------------------------------------------------------------------------------------------------------------------------------------------------------------------------------------------------------------------------------------------------------------------------------------------------------------------------------------------------------------------------------------------------------------------------|-------------------------------------------------------------------------------------------|
| <p><b>BUDESONIDE ORAL SUSPENSION TREATMENT IMPROVES DYSPHAGIA SYMPTOMS IN PATIENTS WITH EOSINOPHILIC ESOPHAGITIS.</b><br/> Hirano I., Collins M., Katzka D., Mukkada V., Falk G., Johnston D., Soteres D., Williams J., Desai N., Lan L., Morey R., Dellon E.<br/> Annals of Allergy, Asthma and Immunology. Conference: 2019 Annual Scientific Meeting of the American College of Allergy, Asthma and Immunology. Houston United States. 123(5 Supplement) (pp S56-S57), 2019. Date of Publication: November 2019.</p>                                                                                                                                        | Dual publication of an already included study                                             |
| <p>Efficacy and safety of budesonide orodispersible tablets in active eosinophilic oesophagitis: Results from a randomised, double-blind, placebo-controlled, pivotal, European multicentre trial (EOS-1).<br/> Straumann A., Lucendo A.J., Greinwald R., Mueller R., Attwood S.<br/> Swiss Medical Weekly. Conference: Annual Meeting Swiss Society of Gastroenterology, SGG-SSG, Swiss Society of Visceral Surgery, SGVC-SSCV, Swiss Association for the Study of the Liver, SASL and Swiss Society of Endoscopy Nurses and Associates, SVEP-ASPE. Lausanne Switzerland. 147(Supplement 225) (pp 10S), 2017. Date of Publication: September 2017.</p>        | Dual publication of an already included study                                             |
| <p>Dupilumab efficacy and safety in adult patients with active eosinophilic oesophagitis: A randomised double-blind placebo-controlled phase 2 trial.<br/> Hirano I., Dellon E.S., Hamilton J.D., Collins M.H., Peterson K., Chehade M., Schoepfer A.M., Safroneeva E., Rothenberg M.E., Falk G.W., Assouline Dayan Y., Qing Z., Swanson B.N., Pirozzi G., Mannent L., Graham N.M., Akinlade B., Radin A.<br/> United European Gastroenterology Journal. Conference: 25th United European Gastroenterology Week, UEG 2017. Barcelona Spain. 5(8) (pp 1146-1147), 2017. Date of Publication: December 2017.</p>                                                 | Dual publication of an already included study                                             |
| <p>Budesonide orodispersible tablets are highly effective for treatment of active eosinophilic esophagitis: Results from a randomized, double-blind, placebo-controlled, pivotal multicenter trial (EOS-1).<br/> Lucendo A., Miehke S., Vieth M., Schlag C., Von Arnim U., Molina-Infante J., Hartmann D., Bredenoord A.J., De Los Rios C.C., Schubert S., Bruckner S., Madisch A., Hayat J.O., Tack J.F., Attwood S.E., Mueller R., Greinwald R., Schoepfer A.M., Straumann A.<br/> Gastroenterology. Conference: Digestive Disease Week 2017, DDW 2017. Chicago, IL United States. 152(5 Supplement 1) (pp S207), 2017. Date of Publication: April 2017.</p> | Dual publication of an already included study                                             |
| <p>Alexander, J. A., Ravi, K., Enders, F. T., Geno, D. M., Kryzer, L. A., Mara, K. C., Smyrk, T. C., &amp; Katzka, D. A. (2017). Montelukast Does not Maintain Symptom Remission After Topical Steroid Therapy for Eosinophilic Esophagitis. <i>Clinical gastroenterology and hepatology : the official clinical practice journal of the American Gastroenterological Association</i>, 15(2), 214–221.e2.<br/> <a href="https://doi.org/10.1016/j.cgh.2016.09.013">https://doi.org/10.1016/j.cgh.2016.09.013</a></p>                                                                                                                                           | Maintenance of remission study.                                                           |
| <p>Miehke, S., Hruz, P., Vieth, M., Bussmann, C., von Arnim, U., Bajbouj, M., Schlag, C., Madisch, A., Fibbe, C., Wittenburg, H., Allescher, H. D., Reinshagen, M., Schubert, S., Tack, J., Müller, M., Krummnerl, P., Arts, J., Mueller, R., Dilger, K., Greinwald, R., ... Straumann, A. (2016). A randomised, double-blind trial comparing budesonide formulations and dosages for short-term treatment of eosinophilic oesophagitis. <i>Gut</i>, 65(3), 390–399. <a href="https://doi.org/10.1136/gutjnl-2014-308815">https://doi.org/10.1136/gutjnl-2014-308815</a></p>                                                                                   | Did not report extractable data on endpoints of interest (duration of treatment 2 weeks). |
| <p>Gupta, S. K., Vitanza, J. M., &amp; Collins, M. H. (2015). Efficacy and safety of oral budesonide suspension in pediatric patients with eosinophilic esophagitis. <i>Clinical gastroenterology and hepatology : the official clinical practice journal of the American Gastroenterological Association</i>, 13(1), 66–76.e3. <a href="https://doi.org/10.1016/j.cgh.2014.05.021">https://doi.org/10.1016/j.cgh.2014.05.021</a></p>                                                                                                                                                                                                                          | Not the population of interest (paediatric study)                                         |



|                                                                                                                                                                                                                                                                                                                                                                                                                                                                                                                                    |                                                                          |
|------------------------------------------------------------------------------------------------------------------------------------------------------------------------------------------------------------------------------------------------------------------------------------------------------------------------------------------------------------------------------------------------------------------------------------------------------------------------------------------------------------------------------------|--------------------------------------------------------------------------|
| Randomized, double-blind, placebo controlled trial demonstrates the efficacy of oral budesonide suspension in improving endoscopically identified esophageal abnormalities in eosinophilic esophagitis.<br>Hirano I., Katzka D.A., Collins M.H., Dellon E.S.<br>Gastroenterology. Conference: Digestive Disease Week 2015, DDW 2015. Washington, DC United States. Conference Publication: (var.pagings). 148(4 SUPPL. 1) (pp S29), 2015. Date of Publication: April 2015.                                                         | Dual publication of an already included study                            |
| Butz, B. K., Wen, T., Gleich, G. J., Furuta, G. T., Spergel, J., King, E., Kramer, R. E., Collins, M. H., Stucke, E., Mangeot, C., Jackson, W. D., O’Gorman, M., Abonia, J. P., Pentiuik, S., Putnam, P. E., & Rothenberg, M. E. (2014). Efficacy, dose reduction, and resistance to high-dose fluticasone in patients with eosinophilic esophagitis. <i>Gastroenterology</i> , 147(2), 324–33.e5.<br><a href="https://doi.org/10.1053/j.gastro.2014.04.019">https://doi.org/10.1053/j.gastro.2014.04.019</a>                      | Not the population of interest (mixed population paediatric-adults)      |
| Spergel, J. M., Rothenberg, M. E., Collins, M. H., Furuta, G. T., Markowitz, J. E., Fuchs, G., 3rd, O’Gorman, M. A., Abonia, J. P., Young, J., Henkel, T., Wilkins, H. J., & Liacouras, C. A. (2012). Reslizumab in children and adolescents with eosinophilic esophagitis: results of a double-blind, randomized, placebo-controlled trial. <i>The Journal of allergy and clinical immunology</i> , 129(2), 456–463.e4633.<br><a href="https://doi.org/10.1016/j.jaci.2011.11.044">https://doi.org/10.1016/j.jaci.2011.11.044</a> | Not the population of interest (mixed population paediatric-adolescents) |
| Assa’ad, A. H., Gupta, S. K., Collins, M. H., Thomson, M., Heath, A. T., Smith, D. A., Perschy, T. L., Jurgensen, C. H., Ortega, H. G., & Aceves, S. S. (2011). An antibody against IL-5 reduces numbers of esophageal intraepithelial eosinophils in children with eosinophilic esophagitis. <i>Gastroenterology</i> , 141(5), 1593–1604. <a href="https://doi.org/10.1053/j.gastro.2011.07.044">https://doi.org/10.1053/j.gastro.2011.07.044</a>                                                                                 | Not the population of interest (paediatric study)                        |
| Straumann, A., Conus, S., Degen, L., Frei, C., Bussmann, C., Beglinger, C., Schoepfer, A., & Simon, H. U. (2011). Long-term budesonide maintenance treatment is partially effective for patients with eosinophilic esophagitis. <i>Clinical gastroenterology and hepatology : the official clinical practice journal of the American Gastroenterological Association</i> , 9(5), 400–9.e1.<br><a href="https://doi.org/10.1016/j.cgh.2011.01.017">https://doi.org/10.1016/j.cgh.2011.01.017</a>                                    | Maintenance of remission study.                                          |
| Dohil, R., Newbury, R., Fox, L., Bastian, J., & Aceves, S. (2010). Oral viscous budesonide is effective in children with eosinophilic esophagitis in a randomized, placebo-controlled trial. <i>Gastroenterology</i> , 139(2), 418–429. <a href="https://doi.org/10.1053/j.gastro.2010.05.001">https://doi.org/10.1053/j.gastro.2010.05.001</a>                                                                                                                                                                                    | Not the population of interest (paediatric study)                        |



**Supplementary Table 2. Characteristics of Included Studies of Randomised Controlled Trials of Topical Steroids, Proton Pump Inhibitors, or Biologics in Patients with Active EoE.**

| Study and year        | Country and number of centres | Population (age) and definition of active EoE                                          | Treatments compared (No. of patients) and duration of therapy                                           | Histological endpoint                                                                       | Endoscopic endpoint                                                                        | Symptomatic endpoint                                                                                                                    | Size of HPF in mm <sup>2</sup> |
|-----------------------|-------------------------------|----------------------------------------------------------------------------------------|---------------------------------------------------------------------------------------------------------|---------------------------------------------------------------------------------------------|--------------------------------------------------------------------------------------------|-----------------------------------------------------------------------------------------------------------------------------------------|--------------------------------|
| <b>Peterson 2010</b>  | United States, single centre  | Adults (18-80) with >15 eos/HPF and symptoms of oesophageal dysfunction                | Esomeprazole 40mg o.d. (n=15) versus fluticasone aerosolised/swallowed 440mcg b.i.d. (n=15) for 8 weeks | Proportion of patients achieving ≤5 eos/HPF<br>Proportion of patients achieving ≤15 eos/HPF | Not assessed                                                                               | Proportion of patients achieving a decrease of dysphagia score of at least two points in a 0-7 dysphagia score                          | 0.53mm <sup>2</sup>            |
| <b>Straumann 2010</b> | Switzerland, single centre    | Adults (>18) with >20 eos/HPF and symptoms of oesophageal dysfunction nonresponsive to | Mepolizumab (750mg at w0 and w1, then 1500mg w5 and w9) (n=5) or placebo (n=6) for 9 weeks              | Proportion of patients achieving <5 eos/HPF<br>Proportion of patients                       | Absent, minor (fine nodules, fine whitish reticular structures, furrows), moderate (bright | Assessment of proportion of days that subjects reported difficulty in swallowing averaged over the 7 days prior to the clinic visit and | 0.30mm <sup>2</sup>            |

|                |                              |                                                                                               |                                                                                      |                                                                                                                                                |                                                                                                       |                                                                                                                                                                                                                                                                               |                     |
|----------------|------------------------------|-----------------------------------------------------------------------------------------------|--------------------------------------------------------------------------------------|------------------------------------------------------------------------------------------------------------------------------------------------|-------------------------------------------------------------------------------------------------------|-------------------------------------------------------------------------------------------------------------------------------------------------------------------------------------------------------------------------------------------------------------------------------|---------------------|
|                |                              | PPIs and topical/systemic steroids                                                            |                                                                                      | achieving <15 eos/HPF                                                                                                                          | white scale- or plaque-like structures, corrugated rings) or severe (mucosal lesions, fixed stenosis) | by ranking the global change of EoE symptoms compared with baseline.                                                                                                                                                                                                          |                     |
| Alexander 2012 | United States, single centre | Adults (18-65) with >20 eos/HPF and symptoms of oesophageal dysfunction nonresponsive to PPIs | Fluticasone aerosolised/swallowed 880mcg b.i.d. (n=21) or placebo (n=15) for 6 weeks | Complete response= decrease in mean eosinophil level of more than 90% from the pretreatment value. Partial response= decrease in more than 50% | Response was defined as resolution of all endoscopic findings                                         | Proportion of patients achieving complete symptomatic response (those who answered “no” to the question, “In the past 2 weeks, have you had trouble swallowing, not associated with other cold symptoms (such as strep throat or mononucleosis)?” on the MDQ 2-week version.) | 0.30mm <sup>2</sup> |

|             |                              |                                                                                             |                                                                                                                |                                                                                                                       |                            |                                                                                                                                                                                                                                                                     |              |
|-------------|------------------------------|---------------------------------------------------------------------------------------------|----------------------------------------------------------------------------------------------------------------|-----------------------------------------------------------------------------------------------------------------------|----------------------------|---------------------------------------------------------------------------------------------------------------------------------------------------------------------------------------------------------------------------------------------------------------------|--------------|
|             |                              |                                                                                             |                                                                                                                | from the pretreatment value.                                                                                          |                            | Proportion of patients achieving partial symptom response (those who answered “yes” to the earlier-described question and a decrease in severity of at least 2 levels (or to a level of “Doesn’t bother me at all”), or a decrease in frequency of at least 1 level |              |
| Dellon 2012 | United States, single centre | Adults (>18) with ≥15 eos/HPF and symptoms of oesophageal dysfunction nonresponsive to PPIs | Budesonide oral suspension 1mg b.i.d. (n=12) or budesonide aerosolised/swallowed 1mg b.i.d. (n=13) for 8 weeks | Proportion of patients achieving <15 eos/HPF<br>Proportion of patients achieving <7 eos/HPF<br>Proportion of patients | Overall endoscopy findings | Symptoms response assessed with MDQ                                                                                                                                                                                                                                 | Not reported |

|                        |                                 |                                                                                                                                       |                                                                                                           |                                                                                                                                                                       |                                                                                |                                                                                         |                      |
|------------------------|---------------------------------|---------------------------------------------------------------------------------------------------------------------------------------|-----------------------------------------------------------------------------------------------------------|-----------------------------------------------------------------------------------------------------------------------------------------------------------------------|--------------------------------------------------------------------------------|-----------------------------------------------------------------------------------------|----------------------|
|                        |                                 |                                                                                                                                       |                                                                                                           | achieving <1<br>eos/HPF                                                                                                                                               |                                                                                |                                                                                         |                      |
| <b>Moawad<br/>2013</b> | United States,<br>single centre | ≥15 eos/HPF and<br>symptoms of<br>oesophageal<br>dysfunction                                                                          | Esomeprazole 40mg o.d. (n=21) or<br>fluticasone aerosolised/swallowed<br>440mcg b.i.d. (n=21) for 8 weeks | Proportion of<br>patients<br>achieving <7<br>eos/HPF                                                                                                                  | Improvement in<br>endoscopic<br>findings (not<br>assessed with<br>EREFS score) | Symptoms response<br>assessed with MDQ                                                  | 0.19 mm <sup>2</sup> |
| <b>Dellon 2017</b>     | United States, 25<br>centres    | Adults<br>and adolescents<br>(11-40) with ≥15<br>eos/HPF and<br>symptoms of<br>oesophageal<br>dysfunction<br>nonresponsive to<br>PPIs | Budesonide oral suspension<br>2mg/10mL b.i.d. (n=51) or placebo<br>(n=42) for 12 weeks                    | Proportion of<br>patients<br>achieving ≤6<br>eos/HPF<br>Proportion of<br>patients<br>achieving ≤15<br>eos/HPF<br>Proportion of<br>patients<br>achieving ≤1<br>eos/HPF | Complete<br>normalization of<br>EREFS score                                    | Proportion of patients with<br>≥30% reduction in DSQ<br>score compared with<br>baseline | 0.30mm <sup>2</sup>  |

|                        |                                                         |                                                                                                                                             |                                                                                                                                                                    |                                                                                                                                                                          |                                                                         |                                                                                                                            |                      |
|------------------------|---------------------------------------------------------|---------------------------------------------------------------------------------------------------------------------------------------------|--------------------------------------------------------------------------------------------------------------------------------------------------------------------|--------------------------------------------------------------------------------------------------------------------------------------------------------------------------|-------------------------------------------------------------------------|----------------------------------------------------------------------------------------------------------------------------|----------------------|
| <b>Dellon 2019</b>     | United States,<br>single centre                         | Adults<br>and adolescents<br>(16-80) with $\geq 15$<br>eos/HPF and<br>symptoms of<br>oesophageal<br>dysfunction<br>nonresponsive to<br>PPIs | Fluticasone aerosolised/swallowed<br>880mcg + placebo slurry b.i.d.<br>(n=55) or budesonide oral viscous<br>1mg/4mL b.i.d. + placebo inhaler<br>(n=56) for 8 weeks | Proportion of<br>patients<br>achieving < 15<br>eos/HPF<br>Proportion of<br>patients<br>achieving < 5<br>eos/HPF<br>Proportion of<br>patients<br>achieving < 1<br>eos/HPF | Improvement in<br>endoscopy<br>findings assessed<br>with EREFS<br>score | Improvement in DSQ                                                                                                         | 0.24 mm <sup>2</sup> |
| <b>Hirano<br/>2019</b> | United States,<br>Canada,<br>Switzerland, 30<br>centres | Adults<br>(18-65) with $\geq 15$<br>eos/HPF and<br>symptoms of<br>oesophageal<br>dysfunction<br>nonresponsive to<br>PPIs                    | RPC4046 180mg qw (n=32) or<br>RPC4046 360mg qw (n=34) or<br>placebo (n=34) for 16 weeks                                                                            | Proportion of<br>patients<br>achieving < 15<br>eos/HPF<br>Proportion of<br>patients<br>achieving < 6<br>eos/HPF                                                          | Improvement in<br>endoscopy<br>findings assessed<br>with EREFS<br>score | Clinical response assessed<br>as change from baseline in<br>the Global EoE Symptom<br>Score and Dysphagia<br>Symptom Diary | 0.30mm <sup>2</sup>  |

|                         |                                                                                                     |                                                                                                                          |                                                                                                |                                                                                                                                                     |                                                                         |                                                                                                                                                                                              |                      |
|-------------------------|-----------------------------------------------------------------------------------------------------|--------------------------------------------------------------------------------------------------------------------------|------------------------------------------------------------------------------------------------|-----------------------------------------------------------------------------------------------------------------------------------------------------|-------------------------------------------------------------------------|----------------------------------------------------------------------------------------------------------------------------------------------------------------------------------------------|----------------------|
| <b>Lucendo<br/>2019</b> | Belgium,<br>Germany, The<br>Netherlands,<br>Spain,<br>Switzerland,<br>United Kingdom,<br>26 centres | Adults<br>(18-75) with $\geq 20$<br>eos/HPF and<br>symptoms of<br>oesophageal<br>dysfunction<br>nonresponsive to<br>PPIs | Budesonide orally disintegrating tablet<br>1 mg b.i.d. (n=59) or placebo (n=29)<br>for 6 weeks | Proportion of<br>patients<br>achieving $\leq 15$<br>eos/HPF                                                                                         | Complete<br>normalization of<br>EREFS score                             | Proportion of patients<br>achieving clinical remission<br>defined as EEsAI $\leq 20$ and<br>Patient Global Assessment<br>of EoE on a 0-10 NRS                                                | 0.34 mm <sup>2</sup> |
| <b>Hirano<br/>2020</b>  | United States, 14<br>centres                                                                        | Adults<br>(18-65) with $\geq 15$<br>eos/HPF and<br>symptoms of<br>oesophageal<br>dysfunction<br>nonresponsive to<br>PPIs | Dupilumab 300mg weekly (n=23) or<br>placebo (n=24) for 10 weeks                                | Proportion of<br>patients<br>achieving $< 15$<br>eos/HPF<br>Proportion of<br>patients<br>achieving<br>$< 1$<br>eos/HPF<br>Proportion of<br>patients | Improvement in<br>endoscopy<br>findings assessed<br>with EREFS<br>score | Proportion of patients<br>achieving clinical remission<br>as defined as EEsAI $\leq 20$<br>Proportion of patients<br>achieving reduction in<br>Straumann Dysphagia<br>Instrument of $\geq 3$ | 0.30 mm <sup>2</sup> |

|                                      |                                                                                                             |                                                                                                                    |                                                                                                                                                                                                                                                                                                                                                             | achieving<br>≤6 eos/HPF                                                                                                                                               |                                                                         |                                                                                                       |                      |
|--------------------------------------|-------------------------------------------------------------------------------------------------------------|--------------------------------------------------------------------------------------------------------------------|-------------------------------------------------------------------------------------------------------------------------------------------------------------------------------------------------------------------------------------------------------------------------------------------------------------------------------------------------------------|-----------------------------------------------------------------------------------------------------------------------------------------------------------------------|-------------------------------------------------------------------------|-------------------------------------------------------------------------------------------------------|----------------------|
| <b>Dellon<br/>2022a</b>              | United States,<br>Canada, Belgium,<br>Switzerland,<br>Spain, Germany,<br>93 centres                         | Adults<br>(18-75) with ≥15<br>eos/HPF and<br>symptoms of<br>oesophageal<br>dysfunction<br>nonresponsive to<br>PPIs | Fluticasone propionate orally<br>disintegrating tablet 3 mg b.i.d. (n=20)<br>or fluticasone propionate orally<br>disintegrating tablet 3 mg o.d. (n=22)<br>or fluticasone propionate orally<br>disintegrating tablet 1.5 mg b.i.d.<br>(n=22) or fluticasone propionate orally<br>disintegrating tablet 1.5 mg o.d. (n=21)<br>or placebo (n=20) for 12 weeks | Proportion of<br>patients<br>achieving <15<br>eos/HPF<br>Proportion of<br>patients<br>achieving <1<br>eos/HPF<br>Proportion of<br>patients<br>achieving ≤6<br>eos/HPF | Improvement in<br>endoscopy<br>findings assessed<br>with EREFS<br>score | Clinical response assessed<br>as change from baseline in<br>the Global EoE Symptom<br>Score and EEsAI | 0.23 mm <sup>2</sup> |
| <b>Dellon<br/>2022b –<br/>Part A</b> | Australia,<br>Belgium, Canada,<br>France, Germany,<br>Italy, Netherlands,<br>Spain, Sweden,<br>Switzerland, | Adults<br>and adolescents<br>(≥12 years) with ≥15<br>eos/HPF and<br>symptoms of<br>oesophageal                     | Dupilumab 300mg weekly (n=42) or<br>placebo (n=39) for 24 weeks                                                                                                                                                                                                                                                                                             | Proportion of<br>patients<br>achieving ≤6<br>eos/HPF<br>Proportion of<br>patients                                                                                     | Improvement in<br>endoscopy<br>findings assessed<br>with EREFS<br>score | Absolute change in DSQ<br>score from baseline                                                         | Not<br>reported      |



|                                      |                                                                                                                                                                |                                                                                                                                                        |                                                                                                                                       |                                                                                        |                                                                         |                                               |                 |
|--------------------------------------|----------------------------------------------------------------------------------------------------------------------------------------------------------------|--------------------------------------------------------------------------------------------------------------------------------------------------------|---------------------------------------------------------------------------------------------------------------------------------------|----------------------------------------------------------------------------------------|-------------------------------------------------------------------------|-----------------------------------------------|-----------------|
|                                      | United Kingdom,<br>United States, 96<br>centres                                                                                                                | dysfunction<br>nonresponsive to<br>PPIs                                                                                                                |                                                                                                                                       | achieving <15<br>eos/HPF<br>Proportion of<br>patients<br>achieving $\leq$ 1<br>eos/HPF |                                                                         |                                               |                 |
| <b>Dellon<br/>2022b –<br/>Part B</b> | Australia,<br>Belgium, Canada,<br>France, Germany,<br>Italy, Netherlands,<br>Spain, Sweden,<br>Switzerland,<br>United Kingdom,<br>United States, 96<br>centres | Adults<br>and adolescents<br>( $\geq$ 12 years) with $\geq$ 15<br>eos/HPF and<br>symptoms of<br>oesophageal<br>dysfunction<br>nonresponsive to<br>PPIs | Dupilumab 300mg weekly (n=80) or<br>dupilumab 300mg 2-weekly (n=81) or<br>placebo (n=79) for 24 weeks                                 | Proportion of<br>patients<br>achieving $\leq$ 6<br>eos/HPF                             | Improvement in<br>endoscopy<br>findings assessed<br>with EREFS<br>score | Absolute change in DSQ<br>score from baseline | Not<br>reported |
| <b>Dellon<br/>2022c</b>              | Australia,<br>Netherlands,<br>United States, 78<br>centres                                                                                                     | Adults<br>and adolescents<br>( $\geq$ 12 years) with $\geq$ 15<br>eos/HPF and                                                                          | Lirentelimab 1mg/kg for one dose then<br>3mg/Kg for 5 doses (n=91) or<br>lirentelimab 1mg/kg (n=93) or placebo<br>(n=92) for 24 weeks | Proportion of<br>patients<br>achieving $\leq$ 6<br>eos/HPF                             | Not reported                                                            | Absolute change in DSQ<br>score from baseline | Not<br>reported |

|                        |                                                                             |                                                                                               |                                                                                    |                                                                                                                                                           |                                                             |                                                                                       |                      |
|------------------------|-----------------------------------------------------------------------------|-----------------------------------------------------------------------------------------------|------------------------------------------------------------------------------------|-----------------------------------------------------------------------------------------------------------------------------------------------------------|-------------------------------------------------------------|---------------------------------------------------------------------------------------|----------------------|
|                        |                                                                             | symptoms of oesophageal dysfunction                                                           |                                                                                    |                                                                                                                                                           |                                                             |                                                                                       |                      |
| <b>Hirano 2022</b>     | United States, 66 centres                                                   | Adults and adolescents (11-55) with $\geq 15$ eos/HPF and symptoms of oesophageal dysfunction | Budesonide oral suspension 2mg/10mL b.i.d. (n=213) or placebo (n=105) for 12 weeks | Proportion of patients achieving $< 15$ eos/HPF<br>Proportion of patients achieving $\leq 1$ eos/HPF<br>Proportion of patients achieving $\leq 6$ eos/HPF | Improvement in endoscopy findings assessed with EREFS score | Proportion of patients with $\geq 30\%$ reduction in DSQ score compared with baseline | 0.30 mm <sup>2</sup> |
| <b>Rothenberg 2023</b> | Canada, France, Germany, Israel, Italy, Japan, Netherlands, Poland, Russia, | Adults and adolescents (12-65) with $\geq 15$ eos/HPF and symptoms of                         | Benralizumab 30mg every four weeks (n=103) or placebo (n=107) for 24 weeks         | Proportion of patients achieving $\leq 6$ eos/HPF                                                                                                         | Improvement in endoscopy findings assessed with EREFS score | Absolute change in DSQ score from baseline                                            | Not reported         |

|  |                                                  |                         |  |  |  |  |  |
|--|--------------------------------------------------|-------------------------|--|--|--|--|--|
|  | Spain, United Kingdom, United States, 78 centres | oesophageal dysfunction |  |  |  |  |  |
|--|--------------------------------------------------|-------------------------|--|--|--|--|--|

**Abbreviations:** **DSQ**, Dysphagia Symptom Questionnaire; **EEsAI**, Eosinophilic Oesophagitis Activity Index; **EoE**, eosinophilic oesophagitis; **eos/HPF**, eosinophils/high-power field; **EREFS**, EoE Endoscopic Reference Score; **MDQ**, Mayo Dysphagia Questionnaire; **NRS**, numerical rating scale; **PPIs**, proton pump inhibitors.

**Supplementary Table 3. Total Number of Trials of Each Treatment, and Total Number of Included Patients Assigned to Each Drug and Placebo in Randomised Controlled Trials of Oral Steroids, Proton Pump Inhibitors, or Biologics in Patients with Active EoE.**

| Treatment                                | Number of RCTs | Total Number of Patients | References |
|------------------------------------------|----------------|--------------------------|------------|
| Esomeprazole                             | 2              | 36                       | [1, 2]     |
| Fluticasone aerosolised/swallowed        | 4              | 112                      | [1-4]      |
| Budesonide aerosolised/swallowed         | 1              | 13                       | [5]        |
| Budesonide oral suspension               | 4              | 332                      | [4-7]      |
| Budesonide orally disintegrating tablet  | 1              | 59                       | [8]        |
| Fluticasone orally disintegrating tablet | 1              | 85                       | [9]        |
| Lirentelimab                             | 1              | 184                      | [10]       |
| Benralizumab                             | 1              | 103                      | [11]       |
| Dupilumab                                | 2              | 226                      | [12, 13]   |
| Mepolizumab                              | 1              | 5                        | [14]       |
| RPC4046                                  | 1              | 66                       | [15]       |
| Placebo                                  | 11             | 592                      | [3, 6-15]  |

**Supplementary Table 4. Risk of Bias of Randomised Controlled Trials of Oral Steroids, Proton Pump Inhibitors, or Biologics in Patients with Active EoE.**

| Study and year | Method of Generation of Randomization Schedule | Method of Concealment of Treatment Allocation | Blinding | Evidence of Incomplete Outcomes Data | Evidence of Selective Reporting of Outcomes |
|----------------|------------------------------------------------|-----------------------------------------------|----------|--------------------------------------|---------------------------------------------|
| Peterson 2010  | Low                                            | Low                                           | High     | Low                                  | High                                        |
| Straumann 2010 | Low                                            | Low                                           | Low      | Low                                  | Low                                         |
| Alexander 2012 | Low                                            | Low                                           | Low      | Low                                  | Low                                         |
| Dellon 2012    | Low                                            | Low                                           | High     | Low                                  | Low                                         |
| Moawad 2013    | Low                                            | Low                                           | High     | Low                                  | Low                                         |
| Dellon 2017    | Low                                            | Low                                           | Low      | Low                                  | Low                                         |
| Dellon 2019    | Low                                            | Low                                           | Low      | Low                                  | Low                                         |
| Hirano 2019    | Low                                            | Low                                           | Low      | Low                                  | Low                                         |
| Lucendo 2019   | Low                                            | Low                                           | Low      | Low                                  | Low                                         |
| Hirano 2020    | Low                                            | Low                                           | Low      | Low                                  | Low                                         |
| Dellon 2022a   | Low                                            | Low                                           | Low      | Low                                  | Low                                         |

|                 |     |         |     |         |         |
|-----------------|-----|---------|-----|---------|---------|
| Dellon 2022b    | Low | Low     | Low | Low     | Low     |
| Dellon 2022c    | Low | Low     | Low | Low     | Unclear |
| Hirano 2022     | Low | Unclear | Low | Low     | Low     |
| Rothenberg 2023 | Low | Low     | Low | Unclear | Low     |

**Supplementary Figure 1A. Network Plot of Studies Reporting Data Concerning Efficacy of Topical Steroids, PPIs, and Biologics in Terms of Failure to Achieve Histological Remission as a Reduction in Oesophageal Eosinophilic Infiltrate to  $\leq 6$  Eosinophils per HPF.**

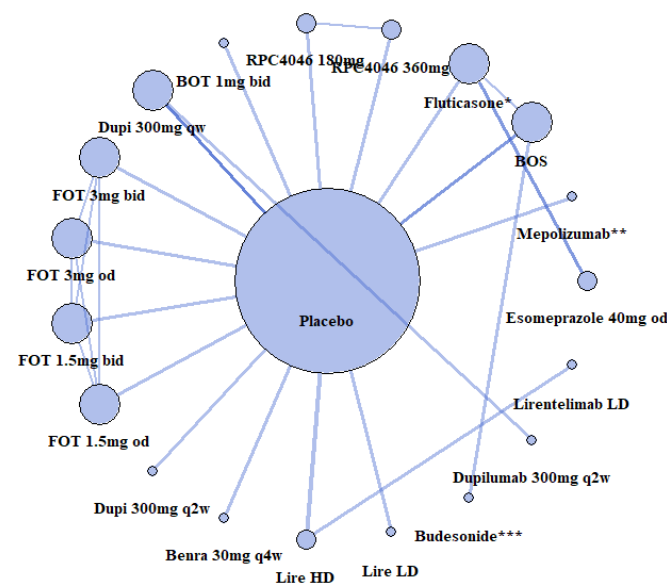

\*Aerosolised 440mcg b.i.d. or 880mcg b.i.d.; \*\*750mg w0-w1 then 1500mg w5-w9; \*\*\*aerosolised 1mg b.i.d.; Lire LD, lirentelimab 1mg/Kg for 6 monthly doses; Lire HD, lirentelimab 1 mg/Kg for the first dose then 3mg/Kg for five monthly doses.



**Supplementary Figure 1B. Funnel Plot of Studies Reporting Data Concerning Efficacy of Topical Steroids, PPIs, and Biologics in Terms of Failure to Achieve Histological Remission as a Reduction in Oesophageal Eosinophilic Infiltrate to  $\leq 6$  Eosinophils per HPF.**

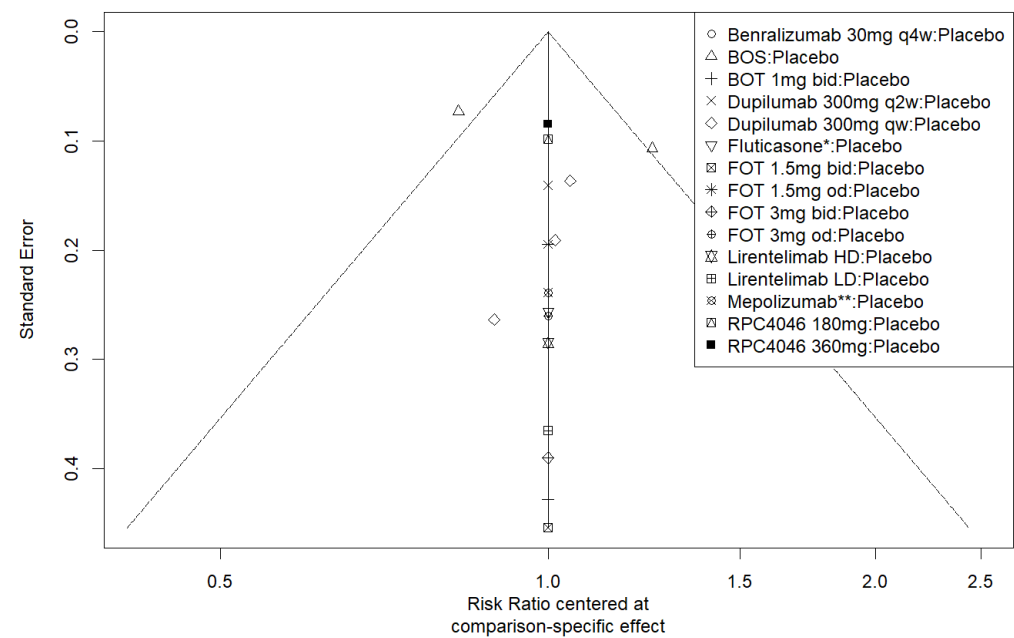

**Supplementary Figure 2A. Network Plot of Studies Reporting Data Concerning Efficacy of Topical Steroids, PPIs, and Biologics in Terms of Failure to Achieve Histological Remission as a Reduction in Oesophageal Eosinophilic Infiltrate to  $\leq 15$  Eosinophils per HPF.**

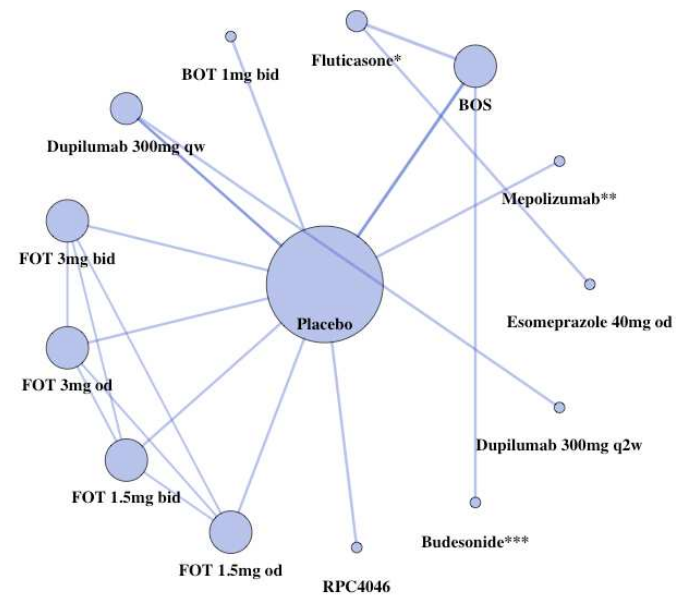

\*Aerosolised 440mcg b.i.d. or 880mcg b.i.d.; \*\*750mg w0-w1 then 1500mg w5-w9; \*\*\*aerosolised 1mg b.i.d.

**Supplementary Figure 2B. Funnel Plot of Studies Reporting Data Concerning Efficacy of Topical Steroids, PPIs, and Biologics in Terms of Failure to Achieve Histological Remission as a Reduction in Oesophageal Eosinophilic Infiltrate to  $\leq 15$  Eosinophils per HPF.**

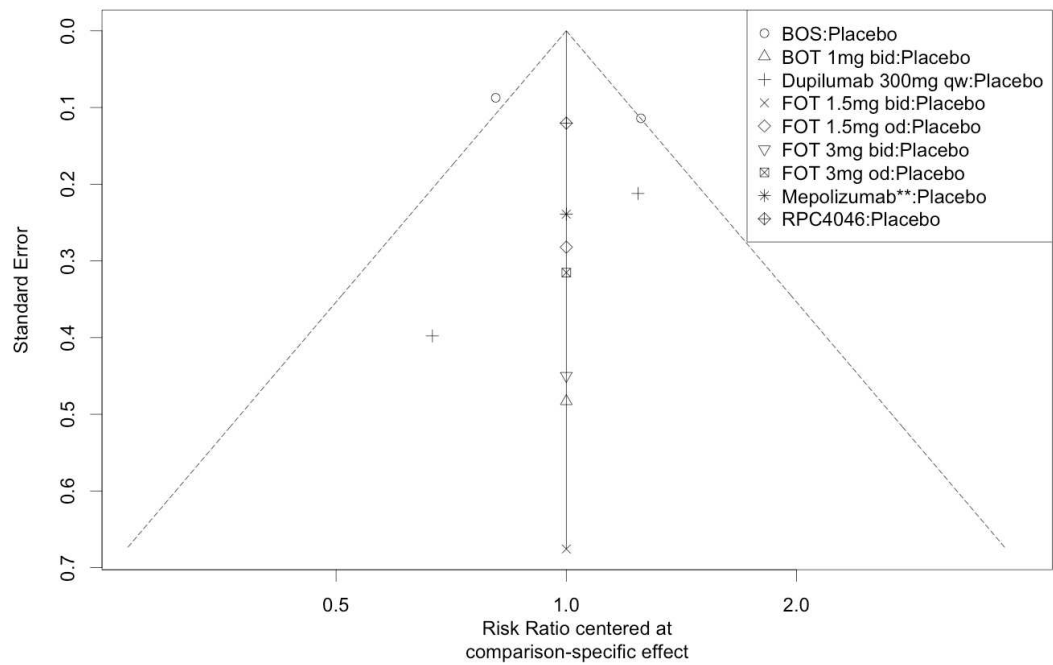

**Supplementary Figure 3. Network Plot of Studies Reporting Data Concerning Efficacy of Topical Steroids, PPIs, and Biologics in Terms of Failure to Achieve Symptomatic Response.**

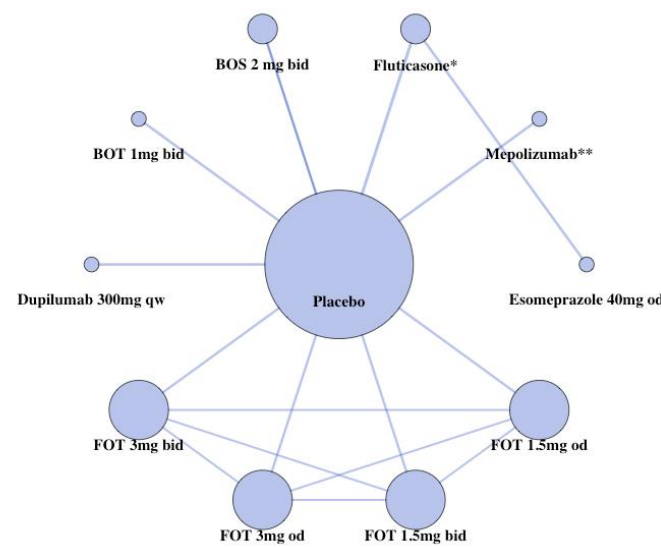

\*Aerosolised 440mcg b.i.d. or 880mcg b.i.d.; \*\*750mg w0-w1 then 1500mg w5-w9.

**Supplementary Figure 4. Network Plot of Studies Reporting Data Concerning Efficacy of Topical Steroids, PPIs, and Biologics in Terms of Failure to Achieve >50 % Endoscopic Improvement Based on the EREFS Score.**

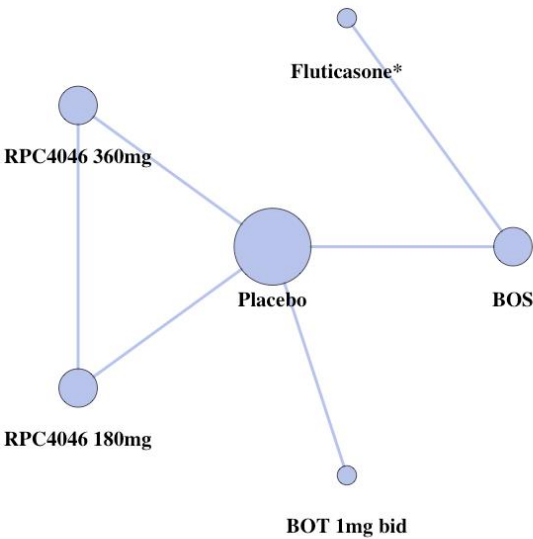

\*Aerosolised 440mcg b.i.d. or 880mcg b.i.d.

Supplementary Figure 5. Network Meta-analysis of Likelihood of Adverse Events.

A. Network Plot for Any Adverse Event.

B. Funnel Plot for Any Adverse Event

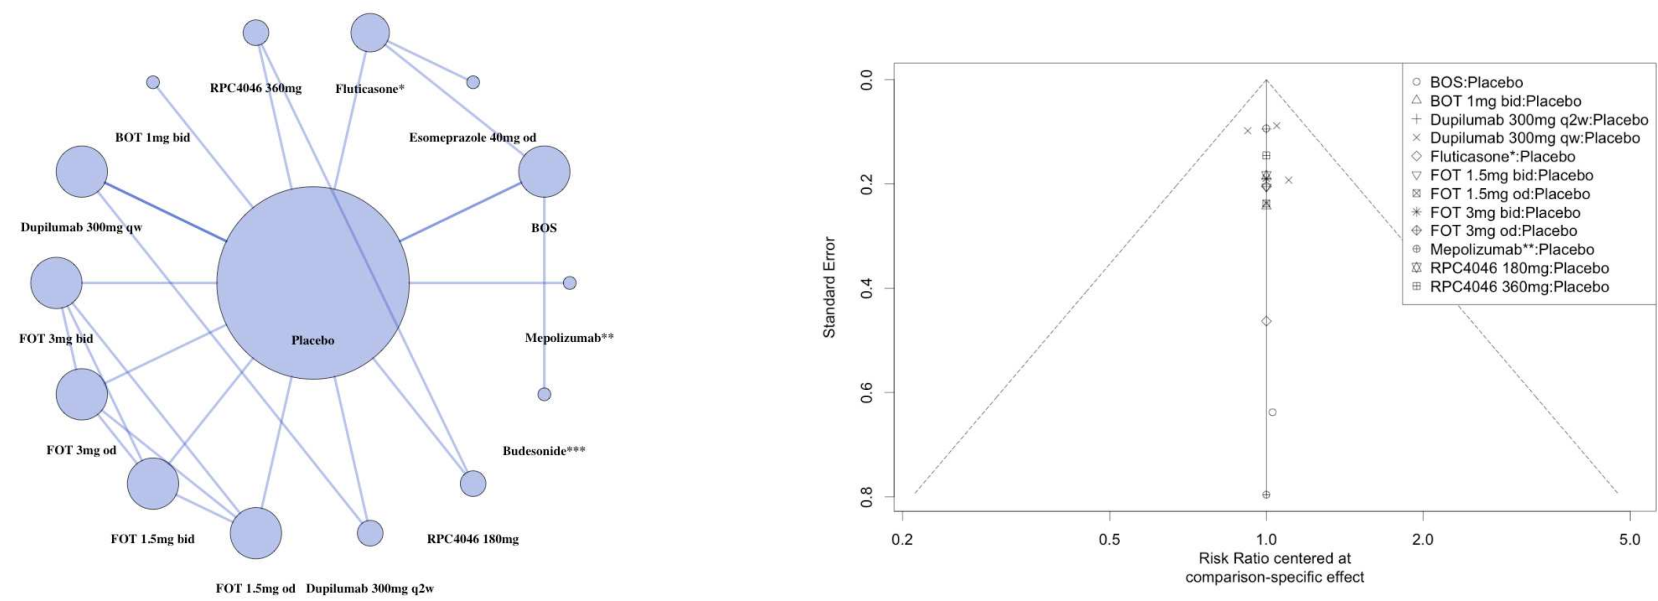

C. Forest Plot for Any Adverse Event.

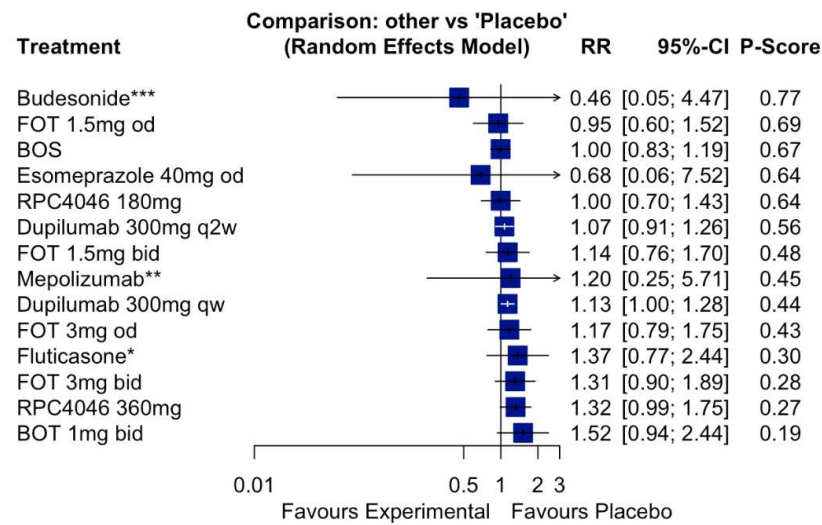

\*Aerosolised 440mcg b.i.d. or 880mcg b.i.d.; \*\*750mg w0-w1 then 1500mg w5-w9; \*\*\*aerosolised 1mg b.i.d.



Supplementary Figure 6. Network Meta-analysis of Likelihood of Withdrawal Due to Adverse Events.

A. Network Plot for Withdrawal Due to Adverse Events.

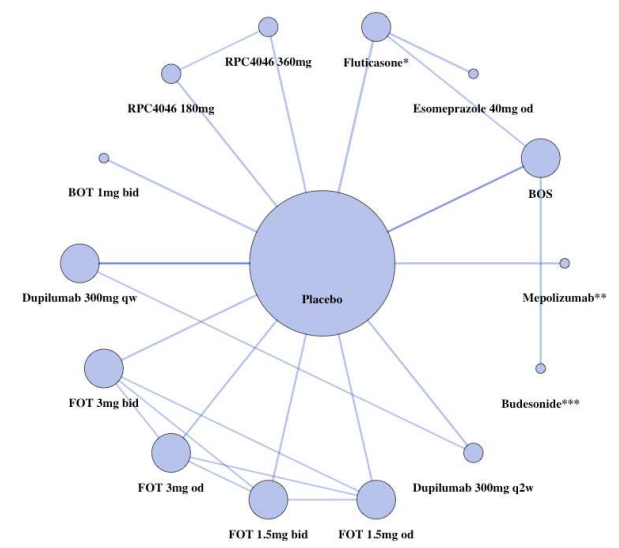

B. Funnel Plot for Withdrawal Due to Adverse Events.

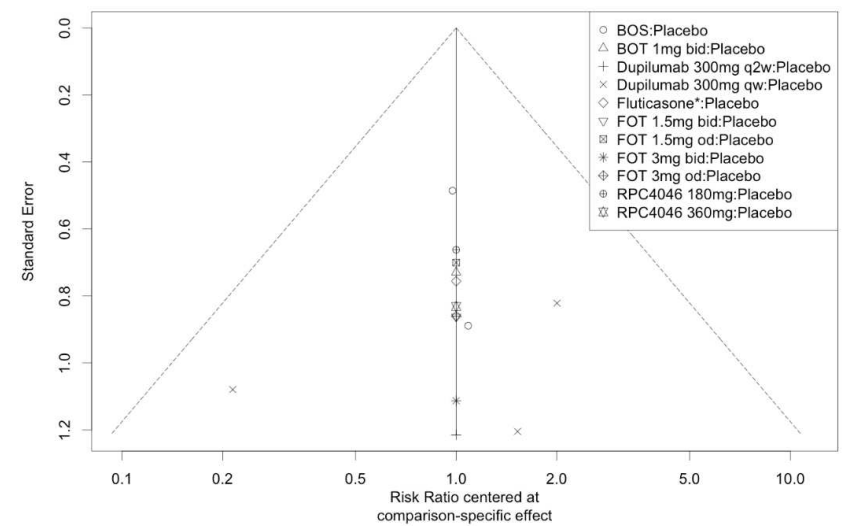

C. Forest Plot for Withdrawal Due to Adverse Events.

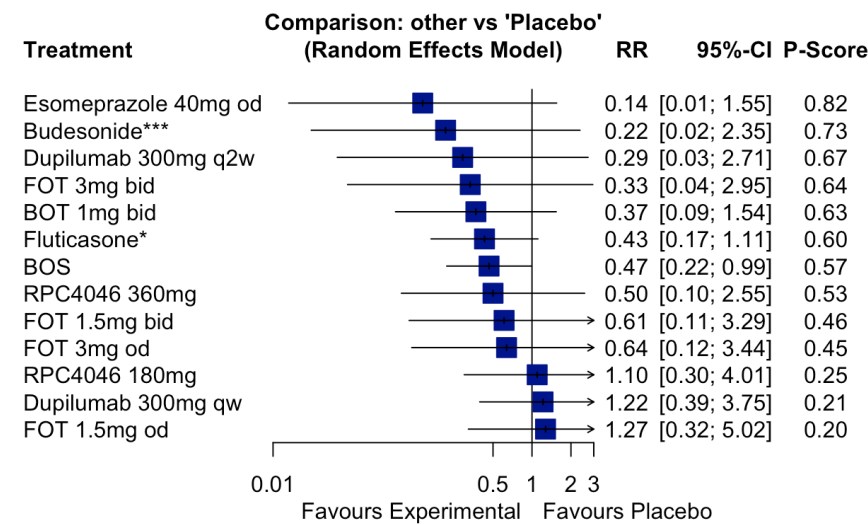

\*Aerosolised 440mcg b.i.d. or 880mcg b.i.d.; \*\*\*aerosolised 1mg b.i.d.

## REFERENCES

1. Peterson, K.A., et al., *Comparison of esomeprazole to aerosolized, swallowed fluticasone for eosinophilic esophagitis*. Dig Dis Sci, 2010. **55**(5): p. 1313-9.
2. Moawad, F.J., et al., *Randomized controlled trial comparing aerosolized swallowed fluticasone to esomeprazole for esophageal eosinophilia*. Am J Gastroenterol, 2013. **108**(3): p. 366-72.
3. Alexander, J.A., et al., *Swallowed fluticasone improves histologic but not symptomatic response of adults with eosinophilic esophagitis*. Clin Gastroenterol Hepatol, 2012. **10**(7): p. 742-749.e1.
4. Dellon, E.S., et al., *Efficacy of Budesonide vs Fluticasone for Initial Treatment of Eosinophilic Esophagitis in a Randomized Controlled Trial*. Gastroenterology, 2019. **157**(1): p. 65-73.e5.
5. Dellon, E.S., et al., *Viscous topical is more effective than nebulized steroid therapy for patients with eosinophilic esophagitis*. Gastroenterology, 2012. **143**(2): p. 321-4.e1.
6. Dellon, E.S., et al., *Budesonide Oral Suspension Improves Symptomatic, Endoscopic, and Histologic Parameters Compared With Placebo in Patients With Eosinophilic Esophagitis*. Gastroenterology, 2017. **152**(4): p. 776-786.e5.
7. Hirano, I., et al., *Budesonide Oral Suspension Improves Outcomes in Patients With Eosinophilic Esophagitis: Results from a Phase 3 Trial*. Clin Gastroenterol Hepatol, 2022. **20**(3): p. 525-534.e10.
8. Lucendo, A.J., et al., *Efficacy of Budesonide Orodispersible Tablets as Induction Therapy for Eosinophilic Esophagitis in a Randomized Placebo-Controlled Trial*. Gastroenterology, 2019. **157**(1): p. 74-86.e15.
9. Dellon, E.S., et al., *Fluticasone Propionate Orally Disintegrating Tablet (APT-1011) for Eosinophilic Esophagitis: Randomized Controlled Trial*. Clin Gastroenterol Hepatol, 2022. **20**(11): p. 2485-2494.e15.
10. Dellon E, C.M., Genta RM, et al. , *Results from KRYPTOS, a phase 2/3 study of liretelimab (AK002) in adults and adolescents with EoE. Abstract presented at: ACG 2022 Annual Meeting; October 21-26, 2022; Charlotte, NC. Abstract D0201. 2022.*
11. Marc E. Rothenberg, E.S.D., Margaret H. Collins, Albert J. Bredenoord, Ikuo Hirano, Kathryn A. Peterson, Laura Brooks, Harald Fjallbrant, Hanna K. Grindebacke, Calvin N. Ho, Matthew Keith, Christopher McCrae, Wendy White, Catherine Datto, *EFFICACY AND SAFETY OF BENRALIZUMAB IN ADULTS AND ADOLESCENTS WITH EOSINOPHILIC ESOPHAGITIS: RESULTS FROM THE 24-WEEK DOUBLE-BLIND PERIOD OF THE PHASE 3 MESSINA TRIAL*. 2023.
12. Dellon, E.S., et al., *Dupilumab in Adults and Adolescents with Eosinophilic Esophagitis*. New England Journal of Medicine, 2022. **387**(25): p. 2317-2330.
13. Hirano, I., et al., *Efficacy of Dupilumab in a Phase 2 Randomized Trial of Adults With Active Eosinophilic Esophagitis*. Gastroenterology, 2020. **158**(1): p. 111-122.e10.
14. Straumann, A., et al., *Anti-interleukin-5 antibody treatment (mepolizumab) in active eosinophilic oesophagitis: a randomised, placebo-controlled, double-blind trial*. Gut, 2010. **59**(1): p. 21-30.
15. Hirano, I., et al., *RPC4046, a Monoclonal Antibody Against IL13, Reduces Histologic and Endoscopic Activity in Patients With Eosinophilic Esophagitis*. Gastroenterology, 2019. **156**(3): p. 592-603.e10.
